# Supplementary material
Source: publisher figshare collection journal article supplement (https://karger.figshare.com/ndownloader/files/30807112)
Supplement: Supplementary file 1 [file 30807112]

Table 5S: Results of retrospective studies

|  |  | **Intervention** | | **Control** | |
| --- | --- | --- | --- | --- | --- |
| **Outome** | **Study** | **events (%)** | **total** | **events (%)** | **total** |
| **Ureteral fistula** | Ameer 2011 [[1](#_ENREF_1)] | 0 (0) | 209 | 0 (0) | 163 |
|  | Moreira 2007 [[2](#_ENREF_2)] | 2 (3,3) | 60 | 6 (2,8) | 217 |
|  | Secin 2002 [[3](#_ENREF_3)] | 21 (13,2) | 159 | 41 (9,9) | 416 |
|  | Tzimas 2003 [[4](#_ENREF_4)] | 0 (0) | 64 | 0 (0) | 148 |
| **Ureteral stricture** | Ameer 2011 [[1](#_ENREF_1)] | 6 (2,9) | 209 | 7 (4,3) | 163 |
|  | Hakim 1994 [[5](#_ENREF_5)] | 21 (4,4) | 478 | 12 (4,1) | 295 |
|  | Lee 2007 [[6](#_ENREF_6)] | 3 (4,1) | 73 | 5 (2,1) | 238 |
|  | Moreira 2007 [[2](#_ENREF_2)] | 1 (1,7) | 60 | 4 (1,8) | 217 |
|  | Pan 2008/2014 [[7](#_ENREF_7), [8](#_ENREF_8)] | 4 (3,3) | 121 | 13 (4,0) | 324 |
|  | Secin 2002 [[3](#_ENREF_3)] | 11 (6,9) | 159 | 40 (9,6) | 416 |
|  | Tzimas 2003 [[4](#_ENREF_4)] | 2 (3,1) | 64 | 11 (7,4) | 148 |
|  | Veale 2006 [[9](#_ENREF_9)] | 11 (3,1) | 353 | 1 (0,3) | 360 |
| ***Haematuria*** | Ameer 2011 [[1](#_ENREF_1)] | 37 (17,7) | 209 | 18 (11,0) | 163 |
|  | Hakim 1994 [[5](#_ENREF_5)] | 6 (1,3) | 478 | 1 (0,3) | 295 |
|  | Lee 2007 [[6](#_ENREF_6)] | 6 (8,2) | 73 | 3 (1,3) | 238 |
|  | Pan 2008/2014 [[7](#_ENREF_7), [8](#_ENREF_8)] | 15 (12,4) | 121 | 12 (3,7) | 324 |
|  | Secin 2002 [[3](#_ENREF_3)] | 9 (5,7) | 159 | 8 (1,9) | 416 |
|  | Tzimas 2003 [[4](#_ENREF_4)] | 22 (34,4) | 64 | 5 (3,4) | 148 |
|  | Veale 2006 [[9](#_ENREF_9)] | 21 (5,9) | 353 | 5 (1,4) | 360 |
| **Urinary leakage** | Ameer 2011 [[1](#_ENREF_1)] | 5 (2,4) | 209 | 4 (2,5) | 163 |
|  | Hakim 1994 | 2 (0,4) | 478 | 4 (1,4) | 295 |
|  | Lee 2007 [[6](#_ENREF_6)] | 6 (8,2) | 73 | 6 (2,5) | 238 |
|  | Pan 2008/2014 [[7](#_ENREF_7), [8](#_ENREF_8)] | 5 (4,1) | 121 | 17 (5,2) | 324 |
|  | Tzimas 2003 [[4](#_ENREF_4)] | 0 (0) | 64 | 5 (3,4) | 148 |
|  | Veale 2006 [[9](#_ENREF_9)] | 20 (5,7) | 353 | 8 (2,2) | 360 |
| **Ureteral reflux** | Ameer 2011 [[1](#_ENREF_1)] | 0 (0) | 209 | 0 (0) | 163 |
|  | Lee 2007 [[6](#_ENREF_6)] | 1 (1,4) | 73 | 2 (0,8) | 238 |
|  | Moreira 2007 [[2](#_ENREF_2)] | 0 (0) | 60 | 0 (0) | 217 |
|  | Pan 2008/2014 [[7](#_ENREF_7), [8](#_ENREF_8)] | 0 (0) | 121 | 6 (1,9) | 324 |
|  | Secin 2002 [[3](#_ENREF_3)] | 0 (0) | 159 | 16 (3,8) | 416 |
|  | Tzimas 2003 [[4](#_ENREF_4)] | 0 (0) | 64 | 0 (0) | 148 |
| **General ureteral complication** | Lee 2007 [[6](#_ENREF_6)] | 11 (15,1) | 73 | 14 (5,9) | 238 |
|  | Moreira 2007 [[2](#_ENREF_2)] | 3 (5) | 60 | 10 (4,6) | 217 |
|  | Pan 2008/2014 [[7](#_ENREF_7), [8](#_ENREF_8)] | 24 (19,8) | 121 | 51 (15,7) | 324 |
|  | Veale 2006 [[9](#_ENREF_9)] | 50 (14,2) | 353 | 14 (3,9) | 360 |

Intervention: Taguchi ureteroneocystostomy; Control: Lich-Gregoir ureteroneocystostomy

References for retrospective studies:

1. Ameer A, Aljiffry M, Jamal M, Hassanain M, Doi S, Fernandez M, et al. Complications of ureterovesical anastomosis in adult renal transplantation: Comparison of the Lich-Gregoire and the Taguchi techniques. Ann Transpl. 2011 Jul-Sep;16(3):82-87.

2. Moreira P, Parada B, Figueiredo A, Maia N, Nunes P, Bastos C, et al. Comparative study between two techniques of ureteroneocystostomy: Taguchi and Lich-Gregoir. Transplantation Proceedings. 2007 Oct;39(8):2480-82.

3. Secin FP, Rovegno AR, Marrugat RE, Virasoro R, Lautersztein GA, Fernandez H. Comparing Taguchi and Lich-Gregoir ureterovesical reimplantation techniques for kidney transplants. 2002 Sep;1(3):926-30.

4. Tzimas GN, Hayati H, Tchervenkov JI, Metrakos PP. Ureteral implantation technique and urologic complications in adult kidney transplantion. Transplantation Proceedings. 2003 Nov;35(7):2420-22.

5. Hakim NS, Benedetti E, Pirenne J, Gillingham KJ, Payne WD, Dunn DL, et al. Complications of ureterovesical anastomosis in kidney transplant patients: the Minnesota experience. 1994 Dec;1(6):504-7.

6. Lee RS, Bakthavatsalam R, Marsh CL, Kuhr CS. Ureteral complications in renal transplantation: A comparison of the Lich-Gregoir versus the Taguchi technique. Transplantation Proceedings. 2007 Jun;39(5):1461-64.

7. Pan X, Xue W, Tian P, Ding X, Yan H, Feng X, et al. Follow-up evaluation of a new ureteral anastomosis technique in renal transplantation. Zhongguo xiu fu chong jian wai ke za zhi [Chinese journal of reparative and reconstructive surgery]. 2008;22(8):998‐1002.

8. Pan XM, Xiang HL, Ding CG, Luo ZZ, Tian PX, Xue WJ. Comparative study of one-stitch versus Lich-Gregoir ureterovesical implantation for kidney transplants. World J Urol. 2014 Oct;32(5):1355-61.

9. Veale J, Yew J, Gjertson D, Danovitch G, Wilkinson A, Pham PT, et al. Long-term comparative outcomes of ureteroneocystostomy techniques in renal transplantation. Journal of Urology. 2006 Apr;175(4):473-73.
